# Supplementary material for: High temperature mortality of Wolbachia impacts the sex ratio of the parasitoid Ooencyrtus mirus (Hymenoptera: Encyrtidae)
Source: PeerJ. 2022 Sep 13;10:e13912. doi: 10.7717/peerj.13912 (PMC9480061; doi:10.7717/peerj.13912)
Supplement: Supplemental Information 1 [file peerj-10-13912-s001.xlsx]

## Sheet: Sheet1
in date	emergence date	female	male	gen.
26°
2018-10-19	2018-11-02	1		F1
2018-10-19	2018-11-02	1		F1
2018-10-19	2018-11-02	1		F1
2018-10-19	2018-11-02	1		F1
2018-10-19	2018-11-02	1		F1
2018-10-19	2018-11-02	1		F1
2018-10-19	2018-11-03	1		F1
2018-10-22	2018-11-05	1		F1
2018-10-22	2018-11-05	1		F1
2018-10-22	2018-11-05	1		F1
2018-10-22	2018-11-05	1		F1
2018-10-22	2018-11-05	1		F1
2018-10-22	2018-11-05	1		F1
2018-10-22	2018-11-05	1		F1
2018-10-22	2018-11-05	1		F1
2018-10-22	2018-11-05	1		F1
2018-10-22	2018-11-05	1		F1
2018-10-23	2018-11-05	1		F1
2018-10-23	2018-11-06	1		F1
2018-10-23	2018-11-06	1		F1
2018-10-23	2018-11-07	1		F1
2018-11-05	2018-11-19	1		F2
2018-11-05	2018-11-19	1		F2
2018-11-05	2018-11-19	1		F2
2018-11-05	2018-11-19	1		F2
2018-11-05	2018-11-19	1		F2
2018-11-05	2018-11-19	1		F2
2018-11-05	2018-11-19	1		F2
2018-11-05	2018-11-19	1		F2
2018-11-05	2018-11-19	1		F2
2018-11-05	2018-11-19	1		F2
2018-11-05	2018-11-19	1		F2
2018-11-05	2018-11-19	1		F2
2018-11-05	2018-11-19	1		F2
2018-11-05	2018-11-19	1		F2
2018-11-05	2018-11-19	1		F2
2018-11-05	2018-11-19	1		F2
2018-11-05	2018-11-19	1		F2
2018-11-05	2018-11-19	1		F2
2018-11-05	2018-11-19	1		F2
2018-11-05	2018-11-19	1		F2
2018-11-05	2018-11-19	1		F2
2018-11-05	2018-11-19	1		F2
2018-11-05	2018-11-19	1		F2
2018-11-05	2018-11-19	1		F2
2018-11-05	2018-11-19	1		F2
2018-11-05	2018-11-19	1		F2
2018-11-05	2018-11-19	1		F2
2018-11-05	2018-11-19	1		F2
2018-11-05	2018-11-19	1		F2
2018-11-05	2018-11-20	1		F2
2018-11-05	2018-11-20	1		F2
2018-11-05	2018-11-20	1		F2
2018-11-05	2018-11-20	1		F2
2018-11-05	2018-11-20	1		F2
2018-11-05	2018-11-20	1		F2
2018-11-05	2018-11-20	1		F2
2018-11-08	2018-11-22	1		F2
2018-11-08	2018-11-22	1		F2
2018-11-08	2018-11-22	1		F2
2018-11-08	2018-11-22	1		F2
2018-11-08	2018-11-22	1		F2
2018-11-08	2018-11-22	1		F2
2018-11-08	2018-11-22	1		F2
2018-11-08	2018-11-22	1		F2
2018-11-08	2018-11-22	1		F2
2018-11-08	2018-11-22	1		F2
2018-11-08	2018-11-22	1		F2
2018-11-08	2018-11-22	1		F2
2018-11-08	2018-11-22	1		F2
2018-11-08	2018-11-22	1		F2
2018-11-08	2018-11-22	1		F2
2018-11-08	2018-11-22	1		F2
2018-11-08	2018-11-22	1		F2
2018-11-08	2018-11-22	1		F2
2018-11-08	2018-11-22	1		F2
2018-11-08	2018-11-22	1		F2
2018-11-08	2018-11-22	1		F2
2018-11-08	2018-11-22	1		F2
2018-11-08	2018-11-22	1		F2
2018-11-08	2018-11-22	1		F2
2018-11-08	2018-11-22	1		F2
2018-11-08	2018-11-22	1		F2
2018-11-08	2018-11-22	1		F2
2018-11-08	2018-11-22	1		F2
2018-11-08	2018-11-22	1		F2
2018-11-08	2018-11-22	1		F2
2018-11-08	2018-11-22	1		F2
2018-11-08	2018-11-22	1		F2
2018-11-08	2018-11-22	1		F2
2018-11-08	2018-11-22	1		F2
2018-11-08	2018-11-22	1		F2
2018-11-08	2018-11-22	1		F2
2018-11-08	2018-11-22	1		F2
2018-11-08	2018-11-22	1		F2
2018-11-08	2018-11-22	1		F2
2018-11-08	2018-11-22	1		F2
2018-11-08	2018-11-22	1		F2
2018-11-08	2018-11-22	1		F2
2018-11-08	2018-11-22	1		F2
2018-11-08	2018-11-22	1		F2
2018-11-08	2018-11-22	1		F2
2018-11-08	2018-11-22	1		F2
2018-11-08	2018-11-22	1		F2
2018-11-08	2018-11-22	1		F2
2018-11-08	2018-11-22	1		F2
2018-11-08	2018-11-22	1		F2
2018-11-08	2018-11-22	1		F2
2018-11-08	2018-11-22	1		F2
2018-11-08	2018-11-22	1		F2
2018-11-08	2018-11-22	1		F2
2018-11-08	2018-11-22	1		F2
2018-11-08	2018-11-22	1		F2
2018-11-08	2018-11-22	1		F2
2018-11-08	2018-11-22	1		F2
2018-11-08	2018-11-22	1		F2
2018-11-08	2018-11-22	1		F2
2018-11-08	2018-11-22	1		F2
2018-11-08	2018-11-22	1		F2
2018-11-08	2018-11-22	1		F2
2018-11-08	2018-11-22	1		F2
2018-11-08	2018-11-22	1		F2
2018-11-08	2018-11-22	1		F2
2018-11-08	2018-11-22	1		F2
2018-11-08	2018-11-22	1		F2
2018-11-08	2018-11-23	1		F2
2018-11-08	2018-11-23	1		F2
2018-11-08	2018-11-23	1		F2
2018-11-08	2018-11-23	1		F2
2018-11-08	2018-11-23	1		F2
2018-11-08	2018-11-23	1		F2
2018-11-08	2018-11-23	1		F2
2018-11-08	2018-11-24	1		F2
2018-11-08	2018-11-27	1		F2
2018-11-09	2018-11-23	1		F2
2018-11-09	2018-11-23	1		F2
2018-11-09	2018-11-23	1		F2
2018-11-09	2018-11-23	1		F2
2018-11-09	2018-11-23	1		F2
2018-11-09	2018-11-23	1		F2
2018-11-09	2018-11-23	1		F2
2018-11-09	2018-11-23	1		F2
2018-11-09	2018-11-23	1		F2
2018-11-09	2018-11-23	1		F2
2018-11-09	2018-11-23	1		F2
2018-11-09	2018-11-23	1		F2
2018-11-09	2018-11-23	1		F2
2018-11-09	2018-11-23	1		F2
2018-11-09	2018-11-23	1		F2
2018-11-09	2018-11-24	1		F2
	F2 total	129	0
30°
in date	em. date	fem.	male	gen.
2018-12-06	2018-12-17	1		F1
2018-12-06	2018-12-17	1		F1
2018-12-06	2018-12-17	1		F1
2018-12-06	2018-12-17	1		F1
2018-12-06	2018-12-17	1		F1
2018-12-06	2018-12-17	1		F1
2018-12-06	2018-12-17	1		F1
2018-12-06	2018-12-17	1		F1
2018-12-06	2018-12-17	1		F1
2018-12-06	2018-12-17	1		F1
2018-12-06	2018-12-17	1		F1
2018-12-06	2018-12-18	1		F1
2018-12-06	2018-12-18	1		F1
2018-12-06	2018-12-18	1		F1
2018-12-06	2018-12-18	1		F1
2018-12-06	2018-12-18	1		F1
2018-12-20	2018-12-30	1		F2
2018-12-20	2018-12-30	1		F2
2018-12-20	2018-12-30	1		F2
2018-12-20	2018-12-30	1		F2
2018-12-20	2018-12-30	1		F2
2018-12-20	2018-12-30	1		F2
2018-12-20	2018-12-30	1		F2
2018-12-20	2018-12-30	1		F2
2018-12-20	2018-12-30	1		F2
2018-12-20	2018-12-30	1		F2
2018-12-20	2018-12-30	1		F2
2018-12-20	2018-12-30	1		F2
2018-12-20	2018-12-30	1		F2
2018-12-20	2018-12-30	1		F2
2018-12-20	2018-12-30	1		F2
2018-12-20	2018-12-30	1		F2
2018-12-20	2018-12-30	1		F2
2018-12-20	2018-12-30	1		F2
2018-12-20	2018-12-30	1		F2
2018-12-20	2018-12-30	1		F2
2018-12-20	2018-12-30	1		F2
2018-12-20	2018-12-30	1		F2
2018-12-20	2018-12-30	1		F2
2018-12-20	2018-12-30	1		F2
2018-12-20	2018-12-30	1		F2
2018-12-21	2018-12-31	1		F2
2018-12-21	2018-12-31	1		F2
2018-12-21	2018-12-31	1		F2
2018-12-21	2018-12-31	1		F2
2018-12-21	2018-12-31	1		F2
2018-12-21	2018-12-31	1		F2
2018-12-21	2018-12-31	1		F2
2018-12-21	2018-12-31	1		F2
2018-12-21	2018-12-31	1		F2
2019-12-21	2019-01-01	1		F2
	F2 total	35	0
31°
in date	em. date	fem.	male	gen.
2019-06-03	2019-06-12	1		F1
2019-06-03	2019-06-12	1		F1
2019-06-03	2019-06-12	1		F1
2019-06-03	2019-06-12	1		F1
2019-06-03	2019-06-12	1		F1
2019-06-03	2019-06-12	1		F1
2019-06-03	2019-06-12	1		F1
2019-06-03	2019-06-12	1		F1
2019-06-03	2019-06-12	1		F1
2019-06-03	2019-06-12	1		F1
2019-06-03	2019-06-12	1		F1
2019-06-03	2019-06-12	1		F1
2019-06-03	2019-06-12	1		F1
2019-06-03	2019-06-12	1		F1
2019-06-03	2019-06-12	1		F1
2019-06-03	2019-06-12	1		F1
2019-06-03	2019-06-12	1		F1
2019-06-03	2019-06-12	1		F1
2019-06-03	2019-06-12	1		F1
2019-06-03	2019-06-12	1		F1
2019-06-03	2019-06-12	1		F1
2019-06-03	2019-06-12	1		F1
2019-06-03	2019-06-12	1		F1
2019-06-03	2019-06-12	1		F1
2019-06-03	2019-06-12	1		F1
2019-06-03	2019-06-12	1		F1
2019-06-03	2019-06-12	1		F1
2019-06-03	2019-06-12	1		F1
2019-06-03	2019-06-12	1		F1
2019-06-03	2019-06-12	1		F1
2019-06-03	2019-06-12	1		F1
2019-06-03	2019-06-12	1		F1
2019-06-03	2019-06-12	1		F1
2019-06-03	2019-06-12	1		F1
2019-06-03	2019-06-12	1		F1
2019-06-03	2019-06-12	1		F1
2019-06-03	2019-06-12	1		F1
2019-06-03	2019-06-12	1		F1
2019-06-03	2019-06-12	1		F1
2019-06-03	2019-06-12	1		F1
2019-06-03	2019-06-12	1		F1
2019-06-03	2019-06-13	1		F1
2019-06-03	2019-06-13	1		F1
2019-06-03	2019-06-13	1		F1
2019-06-03	2019-06-13	1		F1
2019-06-03	2019-06-13	1		F1
2019-06-03	2019-06-13	1		F1
2019-06-03	2019-06-13	1		F1
2019-06-03	2019-06-13	1		F1
2019-06-03	2019-06-13	1		F1
2019-06-03	2019-06-13	1		F1
2019-06-03	2019-06-13	1		F1
2019-06-03	2019-06-13	1		F1
2019-06-03	2019-06-13	1		F1
2019-06-03	2019-06-13	1		F1
2019-06-03	2019-06-13	1		F1
2019-06-03	2019-06-13	1		F1
2019-06-03	2019-06-14	1		F1
2019-06-03	2019-06-14	1		F1
2019-06-03	2019-06-14	1		F1
2019-06-03	2019-06-12	1		F1
2019-06-03	2019-06-12	1		F1
2019-06-03	2019-06-12	1		F1
2019-06-03	2019-06-12	1		F1
2019-06-03	2019-06-12	1		F1
2019-06-03	2019-06-12	1		F1
2019-06-03	2019-06-12	1		F1
2019-06-03	2019-06-12	1		F1
2019-06-03	2019-06-12	1		F1
2019-06-03	2019-06-12	1		F1
2019-06-03	2019-06-12	1		F1
2019-06-03	2019-06-13	1		F1
2019-06-03	2019-06-13	1		F1
2019-06-03	2019-06-13	1		F1
2019-06-03	2019-06-13	1		F1
2019-06-03	2019-06-13	1		F1
2019-06-03	2019-06-13	1		F1
2019-06-03	2019-06-13	1		F1
2019-06-03	2019-06-13	1		F1
2019-06-03	2019-06-13	1		F1
2019-06-03	2019-06-13	1		F1
2019-06-03	2019-06-13	1		F1
2019-06-03	2019-06-13	1		F1
2019-06-03	2019-06-13	1		F1
2019-06-03	2019-06-13	1		F1
2019-06-03	2019-06-13	1		F1
2019-06-03	2019-06-13	1		F1
2019-06-03	2019-06-14	1		F1
2019-06-03	2019-06-14	1		F1
2019-06-15	2019-06-24	1		F2
2019-06-15	2019-06-24	1		F2
2019-06-15	2019-06-24	1		F2
2019-06-15	2019-06-24	1		F2
2019-06-15	2019-06-24	1		F2
2019-06-15	2019-06-24	1		F2
2019-06-15	2019-06-24	1		F2
2019-06-15	2019-06-24	1		F2
2019-06-15	2019-06-24	1		F2
2019-06-15	2019-06-24	1		F2
2019-06-15	2019-06-24	1		F2
2019-06-15	2019-06-24	1		F2
2019-06-15	2019-06-24	1		F2
2019-06-15	2019-06-24	1		F2
2019-06-15	2019-06-24	1		F2
2019-06-15	2019-06-24	1		F2
2019-06-15	2019-06-24	1		F2
2019-06-15	2019-06-24		1	F2
2019-06-15	2019-06-24		1	F2
2019-06-15	2019-06-24		1	F2
2019-06-15	2019-06-25	1		F2
2019-06-15	2019-06-25	1		F2
2019-06-15	2019-06-25	1		F2
2019-06-15	2019-06-25	1		F2
2019-06-15	2019-06-25	1		F2
2019-06-15	2019-06-25	1		F2
2019-06-15	2019-06-25	1		F2
2019-06-15	2019-06-26	1		F2
2019-06-15	2019-06-26	1		F2
	F2 total	26	3
32°
in date	em. date	fem.	male	gen.
2018-12-06	2018-12-16	1		F1
2018-12-06	2018-12-16	1		F1
2018-12-06	2018-12-16	1		F1
2018-12-06	2018-12-16	1		F1
2018-12-06	2018-12-16	1		F1
2018-12-06	2018-12-16	1		F1
2018-12-06	2018-12-16	1		F1
2018-12-06	2018-12-16	1		F1
2018-12-06	2018-12-16	1		F1
2018-12-06	2018-12-16	1		F1
2018-12-06	2018-12-16	1		F1
2018-12-06	2018-12-16	1		F1
2018-12-06	2018-12-16	1		F1
2018-12-06	2018-12-17	1		F1
2018-12-06	2018-12-17	1		F1
2018-12-06
2018-12-19	2018-12-28	1		F2
2018-12-19	2018-12-28	1		F2
2018-12-19	2018-12-28	1		F2
2018-12-19	2018-12-28	1		F2
2018-12-19	2018-12-28	1		F2
2018-12-19	2018-12-28	1		F2
2018-12-19	2018-12-28	1		F2
2018-12-19	2018-12-28	1		F2
2018-12-19	2018-12-28	1		F2
2018-12-19	2018-12-28	1		F2
2018-12-19	2018-12-28	1		F2
2018-12-19	2018-12-28	1		F2
2018-12-19	2018-12-28	1		F2
2018-12-19	2018-12-28	1		F2
2018-12-19	2018-12-28	1		F2
2018-12-19	2018-12-28	1		F2
2018-12-19	2018-12-28	1		F2
2018-12-19	2018-12-28	1		F2
2018-12-19	2018-12-28	1		F2
2018-12-19	2018-12-28	1		F2
2018-12-19	2018-12-28	1		F2
2018-12-19	2018-12-28	1		F2
2018-12-19	2018-12-28	1		F2
2018-12-19	2018-12-28	1		F2
2018-12-19	2018-12-28	1		F2
2018-12-19	2018-12-28	1		F2
2018-12-19	2018-12-28	1		F2
2018-12-19	2018-12-28	1		F2
2018-12-19	2018-12-28	1		F2
2018-12-19	2018-12-28	1		F2
2018-12-19	2018-12-28	1		F2
2018-12-19	2018-12-28	1		F2
2018-12-19	2018-12-28	1		F2
2018-12-19	2018-12-28	1		F2
2018-12-19	2018-12-28	1		F2
2018-12-19	2018-12-28	1		F2
2018-12-19	2018-12-28	1		F2
2018-12-19	2018-12-28	1		F2
2018-12-19	2018-12-28	1		F2
2018-12-19	2018-12-28	1		F2
2018-12-19	2018-12-28	1		F2
2018-12-19	2018-12-28	1		F2
2018-12-19	2018-12-28	1		F2
2018-12-19	2018-12-28	1		F2
2018-12-19	2018-12-28		1	F2
2019-12-19	2019-01-01	1		F2
2018-12-20	2018-12-29	1		F2
2018-12-20	2018-12-29	1		F2
2018-12-20	2018-12-29	1		F2
2018-12-20	2018-12-29	1		F2
2018-12-20	2018-12-29	1		F2
	F2 total	50	1
33°
in date	em. date	fem.	male	gen.
2019-01-08	2019-01-17	1		F1
2019-01-08	2019-01-17	1		F1
2019-01-08	2019-01-17	1		F1
2019-01-08	2019-01-17	1		F1
2019-01-08	2019-01-17	1		F1
2019-01-08	2019-01-17	1		F1
2019-01-08	2019-01-17	1		F1
2019-01-08	2019-01-17	1		F1
2019-01-08	2019-01-17	1		F1
2019-01-08	2019-01-17	1		F1
2019-01-08	2019-01-17	1		F1
2019-01-08	2019-01-17	1		F1
2019-01-08	2019-01-17	1		F1
2019-01-08	2019-01-17	1		F1
2019-01-08	2019-01-17	1		F1
2019-01-08	2019-01-17	1		F1
2019-01-08	2019-01-17	1		F1
2019-01-08	2019-01-17	1		F1
2019-01-08	2019-01-17	1		F1
2019-01-08	2019-01-17	1		F1
2019-01-20	2019-01-28	1		F2
2019-01-20	2019-01-28	1		F2
2019-01-20	2019-01-28	1		F2
2019-01-20	2019-01-28	1		F2
2019-01-20	2019-01-28	1		F2
2019-01-20	2019-01-28	1		F2
2019-01-20	2019-01-28	1		F2
2019-01-20	2019-01-28	1		F2
2019-01-20	2019-01-28	1		F2
2019-01-20	2019-01-28	1		F2
2019-01-20	2019-01-28	1		F2
2019-01-20	2019-01-28	1		F2
2019-01-20	2019-01-28	1		F2
2019-01-20	2019-01-28	1		F2
2019-01-20	2019-01-28	1		F2
2019-01-20	2019-01-28	1		F2
2019-01-20	2019-01-28	1		F2
2019-01-20	2019-01-28	1		F2
2019-01-20	2019-01-28	1		F2
2019-01-20	2019-01-28	1		F2
2019-01-20	2019-01-28	1		F2
2019-01-20	2019-01-28	1		F2
2019-01-20	2019-01-28		1	F2
2019-01-20	2019-01-28		1	F2
2019-01-20	2019-01-28		1	F2
2019-01-20	2019-01-28		1	F2
2019-01-20	2019-01-28		1	F2
2019-01-20	2019-01-28		1	F2
2019-01-20	2019-01-28		1	F2
2019-01-20	2019-01-28		1	F2
2019-01-20	2019-01-28		1	F2
2019-01-20	2019-01-28		1	F2
2019-01-20	2019-01-28		1	F2
2019-01-20	2019-01-28		1	F2
2019-01-20	2019-01-28		1	F2
2019-01-20	2019-01-28		1	F2
	F2 total	22	14
34°
in date	em. date	fem.	male	gen.
2018-12-06	2018-12-15	1		F1
2018-12-06	2018-12-15	1		F1
2018-12-06	2018-12-15	1		F1
2018-12-06	2018-12-15	1		F1
2018-12-06	2018-12-15	1		F1
2018-12-06	2018-12-15	1		F1
2018-12-06	2018-12-15	1		F1
2018-12-06	2018-12-15	1		F1
2018-12-06	2018-12-15	1		F1
2018-12-06	2018-12-15	1		F1
2018-12-06	2018-12-15	1		F1
2018-12-06	2018-12-15	1		F1
2018-12-06	2018-12-15	1		F1
2018-12-06	2018-12-15	1		F1
2018-12-06	2018-12-16	1		F1
2018-12-06	2018-12-18	1		F1
2018-12-18	2018-12-26		1	F2
2018-12-18	2018-12-26		1	F2
2018-12-18	2018-12-26		1	F2
2018-12-18	2018-12-26		1	F2
2018-12-18	2018-12-26		1	F2
2018-12-18	2018-12-26		1	F2
2018-12-18	2018-12-26		1	F2
2018-12-18	2018-12-26		1	F2
2018-12-18	2018-12-26		1	F2
2018-12-18	2018-12-26		1	F2
2018-12-18	2018-12-26		1	F2
2018-12-18	2018-12-26		1	F2
2018-12-18	2018-12-26		1	F2
2018-12-18	2018-12-26		1	F2
2018-12-18	2018-12-26		1	F2
2018-12-18	2018-12-26		1	F2
2018-12-18	2018-12-26		1	F2
2018-12-18	2018-12-26		1	F2
2018-12-18	2018-12-26		1	F2
2018-12-18	2018-12-27		1	F2
2018-12-18	2018-12-27		1	F2
2018-12-18	2018-12-27		1	F2
2018-12-18	2018-12-27		1	F2
2018-12-19	2018-12-27		1	F2
2018-12-19	2018-12-27		1	F2
2018-12-19	2018-12-28		1	F2
2018-12-21	2018-12-29		1	F2
2018-12-21	2018-12-29		1	F2
	F2 total	0	28
36°
in date	em. date	fem.	male	gen.
2018-10-19	2018-10-27	1		F1
2018-10-19	2018-10-27	1		F1
2018-10-19	2018-10-27	1		F1
2018-10-19	2018-10-27	1		F1
2018-10-19	2018-10-27	1		F1
2018-10-19	2018-10-27	1		F1
2018-10-22	2018-10-30	1		F1
2018-10-22	2018-10-30	1		F1
2018-10-22	2018-10-30	1		F1
2018-10-22	2018-10-30	1		F1
2018-10-22	2018-10-30	1		F1
2018-10-22	2018-10-30	1		F1
2018-10-22	2018-10-30	1		F1
2018-10-22	2018-10-30	1		F1
2018-10-22	2018-11-01	1		F1
2018-10-23	2018-10-30	1		F1
2018-10-23	2018-10-30	1		F1
2018-10-23	2018-10-31	1		F1
2018-10-23				F1
2018-10-30	2018-11-07		1	F2
2018-10-30	2018-11-07		1	F2
2018-10-30	2018-11-07		1	F2
2018-10-30	2018-11-07		1	F2
2018-10-30	2018-11-07		1	F2
2018-10-30	2018-11-07		1	F2
2018-10-30	2018-11-07		1	F2
2018-10-30	2018-11-07		1	F2
2018-10-30	2018-11-07		1	F2
2018-10-30	2018-11-07		1	F2
2018-10-30	2018-11-07		1	F2
2018-10-30	2018-11-07		1	F2
2018-10-30	2018-11-07		1	F2
2018-10-30	2018-11-07		1	F2
2018-10-30			1	F2
2018-11-02	2018-11-10		1	F2
2018-11-02	2018-11-10		1	F2
2018-11-02	2018-11-10		1	F2
2018-11-02	2018-11-10		1	F2
2018-11-02	2018-11-10		1	F2
2018-11-02	2018-11-10		1	F2
2018-11-02	2018-11-10		1	F2
2018-11-02	2018-11-10		1	F2
2018-11-02	2018-11-10		1	F2
2018-11-02	2018-11-10		1	F2
2018-11-02	2018-11-10		1	F2
2018-11-02	2018-11-10		1	F2
2018-11-02	2018-11-10		1	F2
2018-11-02	2018-11-10		1	F2
2018-11-02	2018-11-10		1	F2
2018-11-02	2018-11-10		1	F2
2018-11-02	2018-11-10		1	F2
2018-11-02	2018-11-10		1	F2
2018-11-02	2018-11-10		1	F2
2018-11-02	2018-11-10		1	F2
2018-11-02	2018-11-10		1	F2
2018-11-02	2018-11-10		1	F2
2018-11-02	2018-11-10		1	F2
2018-11-02	2018-11-10		1	F2
2018-11-02	2018-11-10		1	F2
2018-11-02	2018-11-10		1	F2
2018-11-02	2018-11-10		1	F2
2018-11-02	2018-11-10		1	F2
2018-11-02	2018-11-10		1	F2
2018-11-02	2018-11-10		1	F2
2018-11-02	2018-11-10		1	F2
2018-11-02			1	F2
2018-11-02			1	F2
2018-11-02			1	F2
2018-11-02			1	F2
2018-11-02			1	F2
2018-11-02			1	F2
2018-11-02			1	F2
2018-11-02			1	F2
2018-11-02			1	F2
2018-11-02			1	F2
2018-11-02			1	F2
2018-11-02			1	F2
2018-11-02			1	F2
2018-11-02			1	F2
2018-11-02			1	F2
2018-11-02			1	F2
2018-11-02			1	F2
2018-11-03	2018-11-12		1	F2
2018-11-03	2018-11-12		1	F2
2018-11-03	2018-11-12		1	F2
2018-11-03	2018-11-12		1	F2
2018-11-03	2018-11-12		1	F2
2018-11-04	2018-11-12		1	F2
2018-11-04	2018-11-12		1	F2
2018-11-04	2018-11-12		1	F2
2018-11-04	2018-11-13		1	F2
2018-11-04	2018-11-13		1	F2
2018-11-04
	F2 total	0	73
